# Supplementary material for: CRISPR/CAS Genome Editing Technology: Implications And Challenges
Source: Preprints.org preprint supplement (doi:10.20944/preprints202401.1948.v1), 2024-01-29
Supplement: Supplementary file 1 [file supplementary]

**Review Article**

**CRISPR/CAS GENOME EDITING TECHNOLOGY: IMPLICATIONS AND CHALLENGES**

**Taha Nazir1,2, Hameed Mirza2,3, Nida Taha1**

1. Microbiology and Molecular Biology Research Group, Advanced Multiple Inc., 6660 Kennedy Road, Mississauga ON, L5T2M9 Canada.
2. A.S. Chemical Laboratories Inc., 67 Pippin Rd, Concord, ON L4K4M4 Canada.
3. Department of Chemistry, York University, 4700 Keele St, Toronto, ON M3J1P3 Canada.

**Keywords:** CRISPR-Cas technology, Endonuclease recycling, Genome Editing, Implications.

**Correspondence: Taha Nazir** PhD**,** Microbiology and Molecular Biology Research Group, Advanced Multiple Inc., 6660 Kennedy Road, Mississauga ON, L5T2M9 Canada. C.: +1(647)526-0885, taha@advancedmultiple.ca, https://advancedmultiple.ca

**Authors’ contributions:**

This work was carried out in collaboration among all authors. **Taha Nazir** designed the study of proposed hypothesis and compile the scientific contents. **Nida Taha** elaborated study to make it more credible. Whereas, **Hameed A Mirza** managed the literature searches and citation part of the manuscript. Thus, all authors have read and approved the final manuscript for publication in this journal.

**Ethical Approval and Consent to participate**

All procedures performed in studies are not involving human participants. Therefore there is no need of the ethical approval of the institutional and/or national research committee and 1964 Helsinki declaration and its later amendments or comparable ethical standards. For type of studies no formal consent is required.

**Animal rights**: Additionally, this research studies no animals involved. The authors indicate the procedures followed are in accordance with the standards set forth in the eighth edition of Guide for the Care and Use of Laboratory Animals; published by the National Academy of Sciences, The National Academies Press, Washington, D.C.).

**Consent for publication**

Authors agree and grant consent to publish this article in this research journal.

**Availability of data**

All study information and possible research data successfully incorporated for publication.

**Funding**

This project is not-funded from any local and/ or international organization.

**Competing interests**

The authors also declare that they are no any potential and/ or completing conflict of interest.

**Acknowledgements**

We acknowledge the technical and scientific support of,

1. Advanced Multiple Inc., Mississauga ON, L5T2M9 Canada.
2. A.S. Chemical Laboratories Inc., Concord, ON L4K4M4 Canada.
